# Supplementary material for: Clathrin-mediated Endocytosis of Alpha-1 Antitrypsin is Essential for its Protective Function in Islet Cell Survival
Source: PubMed Central journal article supplement — Theranostics. 2019 May 31;9(13):3940–51. doi: 10.7150/thno.31647 (PMC6587339; doi:10.7150/thno.31647), 2019-05-31
Supplement: thnov09p3940s1.pdf [file thnov09p3940s1.pdf]

## Clathrin-mediated Endocytosis of Alpha-1 Antitrypsin is Essential for its Protective Function in Islet Cell Survival (Supplemental data)

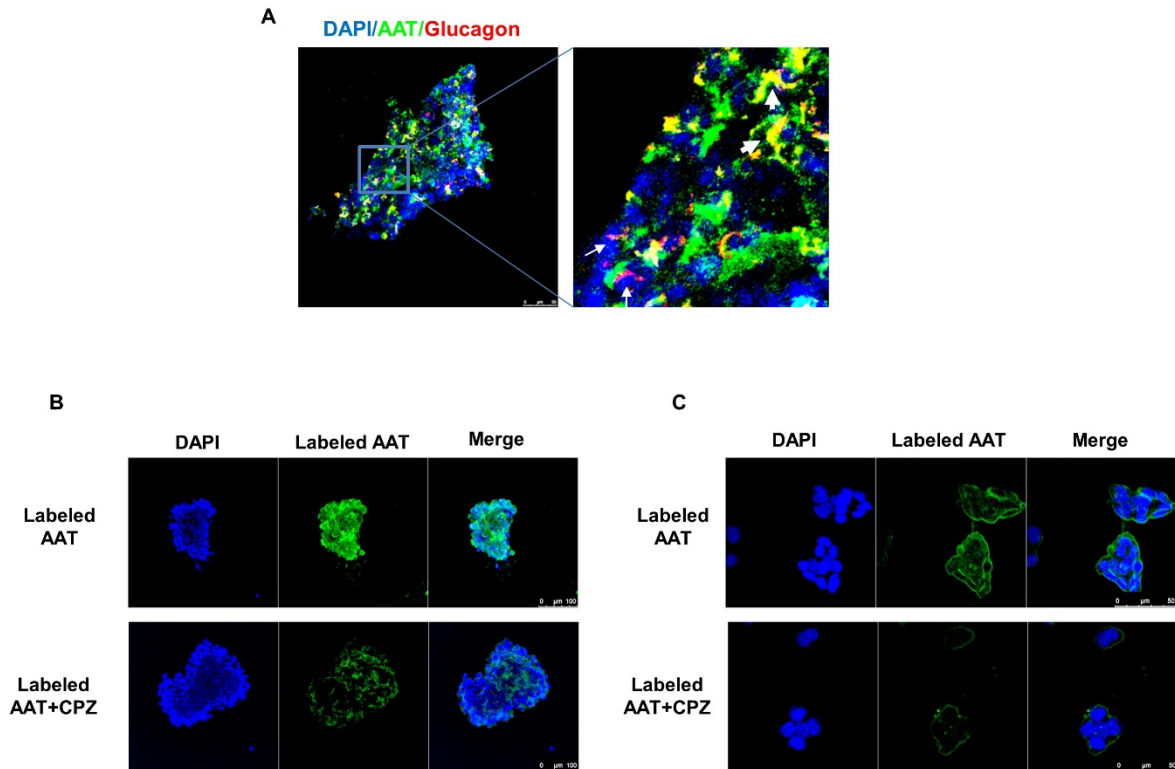

**Supplemental Data, Figure 1.** (A) Representative fluorescent micrographs show human islets stained for AAT (green), glucagon (red) and nuclei (blue). Arrow heads indicate  $\alpha$  cells with the presence and absence of AAT. (B) Representative micrographs of mouse islets treated with labeled AAT (green) in the absence (top panel) or presence of CPZ (bottom panel). Nuclei were stained with DAPI. (C) Representative micrographs of  $\beta$ TC3 cells treated with labeled AAT (green) in the absence (top panel) or presence of CPZ (bottom panel). Nuclei were stained with DAPI.

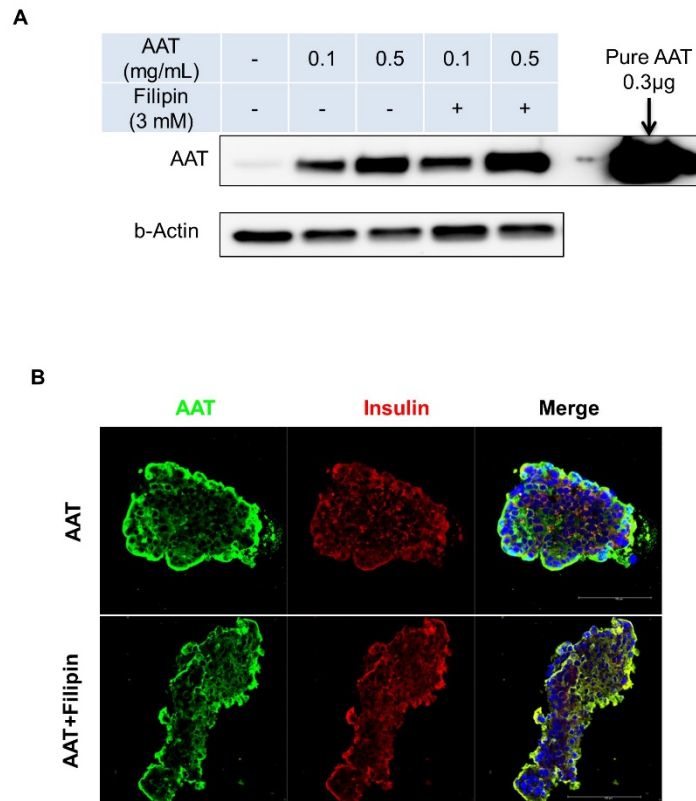

**Supplemental Data, Figure 2.** (A) Immunoblots show the pretreatment with filipin did not influence AAT internalization by human islet cells. (B) Representative fluorescent micrographs show human islets stained for AAT (green), glucagon (red) and nuclei (blue). Scale bar=100  $\mu$ m.

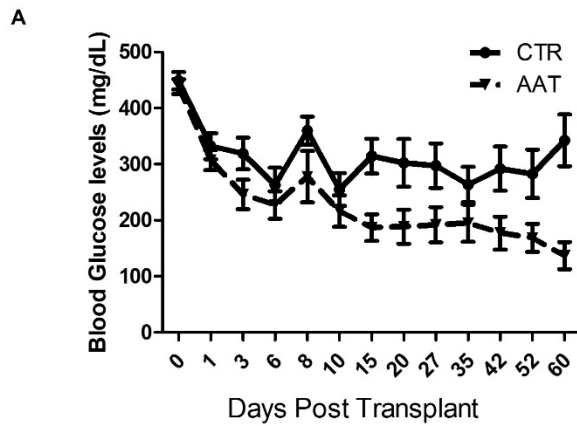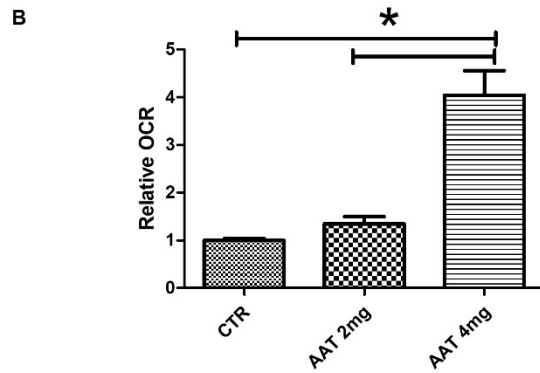

**Supplemental Data, Figure 3.** (A) Glucose levels from days 0–60 PT. CTR consists of animals that received islets from saline-treated donors (n=13). AAT consists of animals that received islets from AAT-treated donors (n=15). (B) OCR of islets isolated from Swiss mice. Donors treated with saline (CTR), donors treated with 80 mg/kg AAT and donors treated with 160 mg/kg AAT.

**Supplemental Data, Table 1.** OCR/DNA levels of human islets after each treatment.

| Treatment        | OCR/DNA (nmol/min.mg DNA $\pm$ SD) |
|------------------|------------------------------------|
| Ctrl             | 124.2 $\pm$ 6.4                    |
| Cytokine         | 84.5 $\pm$ 3.0                     |
| AAT              | 145.6 $\pm$ 19.6                   |
| CPZ              | 113.9 $\pm$ 4.7                    |
| AAT+ Cytokine    | 113.7 $\pm$ 6.1                    |
| AAT+Cytokine+CPZ | 92.9 $\pm$ 1.6                     |
